# Supplementary material
Source: publisher figshare collection journal article supplement (https://tandf.figshare.com/ndownloader/files/17281814)
Supplement: Supplementary file 1 [file 17281814]

**Using MCA Tools for Evaluating Community Managed Forests from a Green Economy Perspective: A Nepal Case Study**

**Highlights**

- A total of 10 indicators and 28 verifiers have been for using MCA tools for green economy principles.
- AHP is the most appropriate tools for identifying best forest management options.
- Forestry stakeholders prefer forest resource condition and economic well-being compare to low carbon emission and social well-being.
- Choice of forest management options differs among stakeholders.
- Multiple use forest management is the most preferable management option
